# Supplementary material for: Characterizing the genetic basis of trait evolution in the Mexican cavefish
Source: PubMed Central journal article supplement (PMC9786752; doi:10.1111/ede.12412), 2022-08-04

Supplementary Figure 1

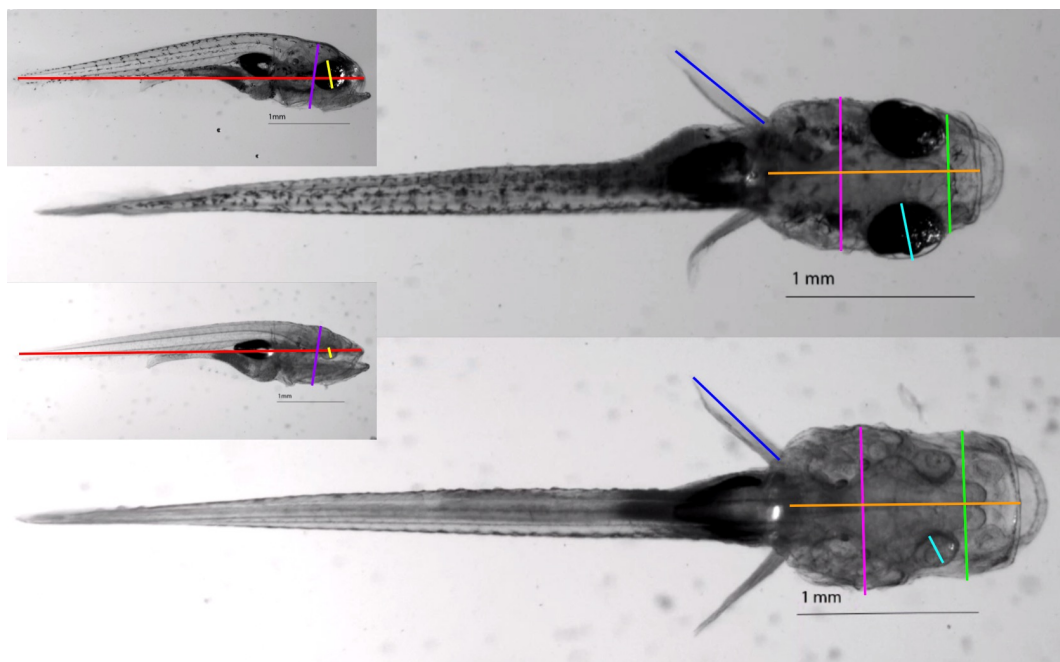

Supplementary Figure 2

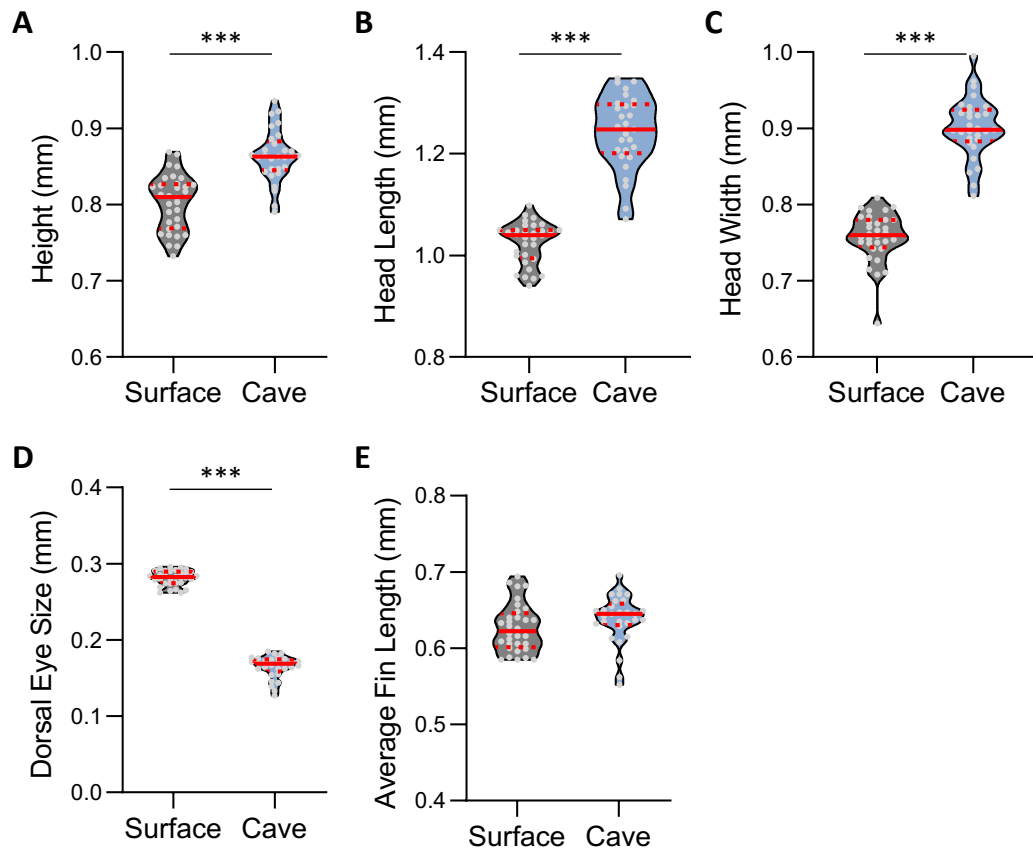

Supplementary Figure 3

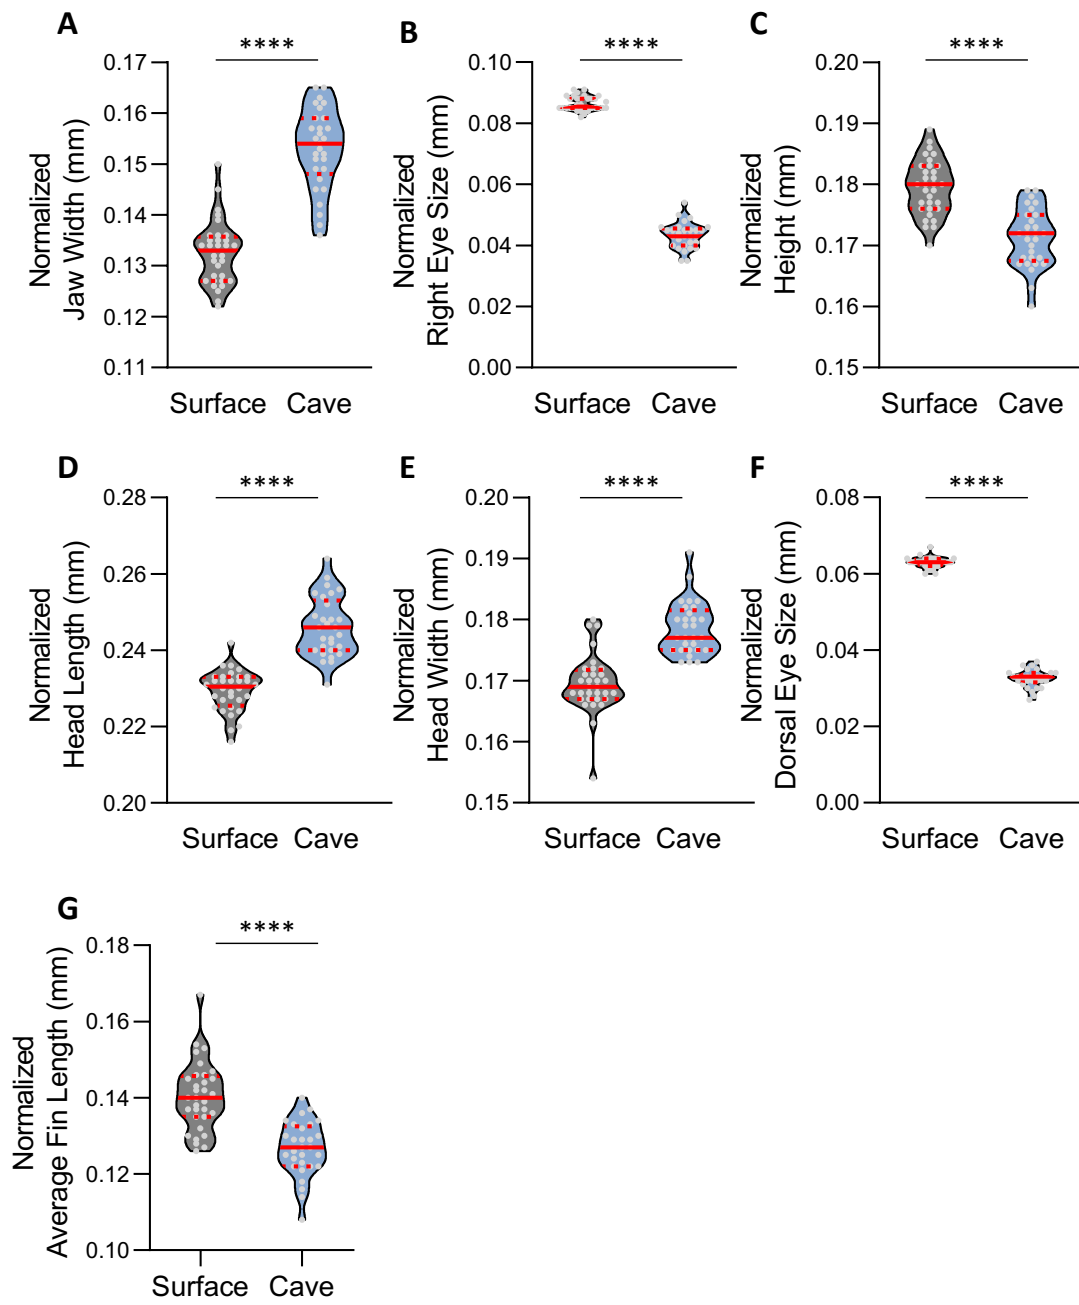

Supplementary Figure 4

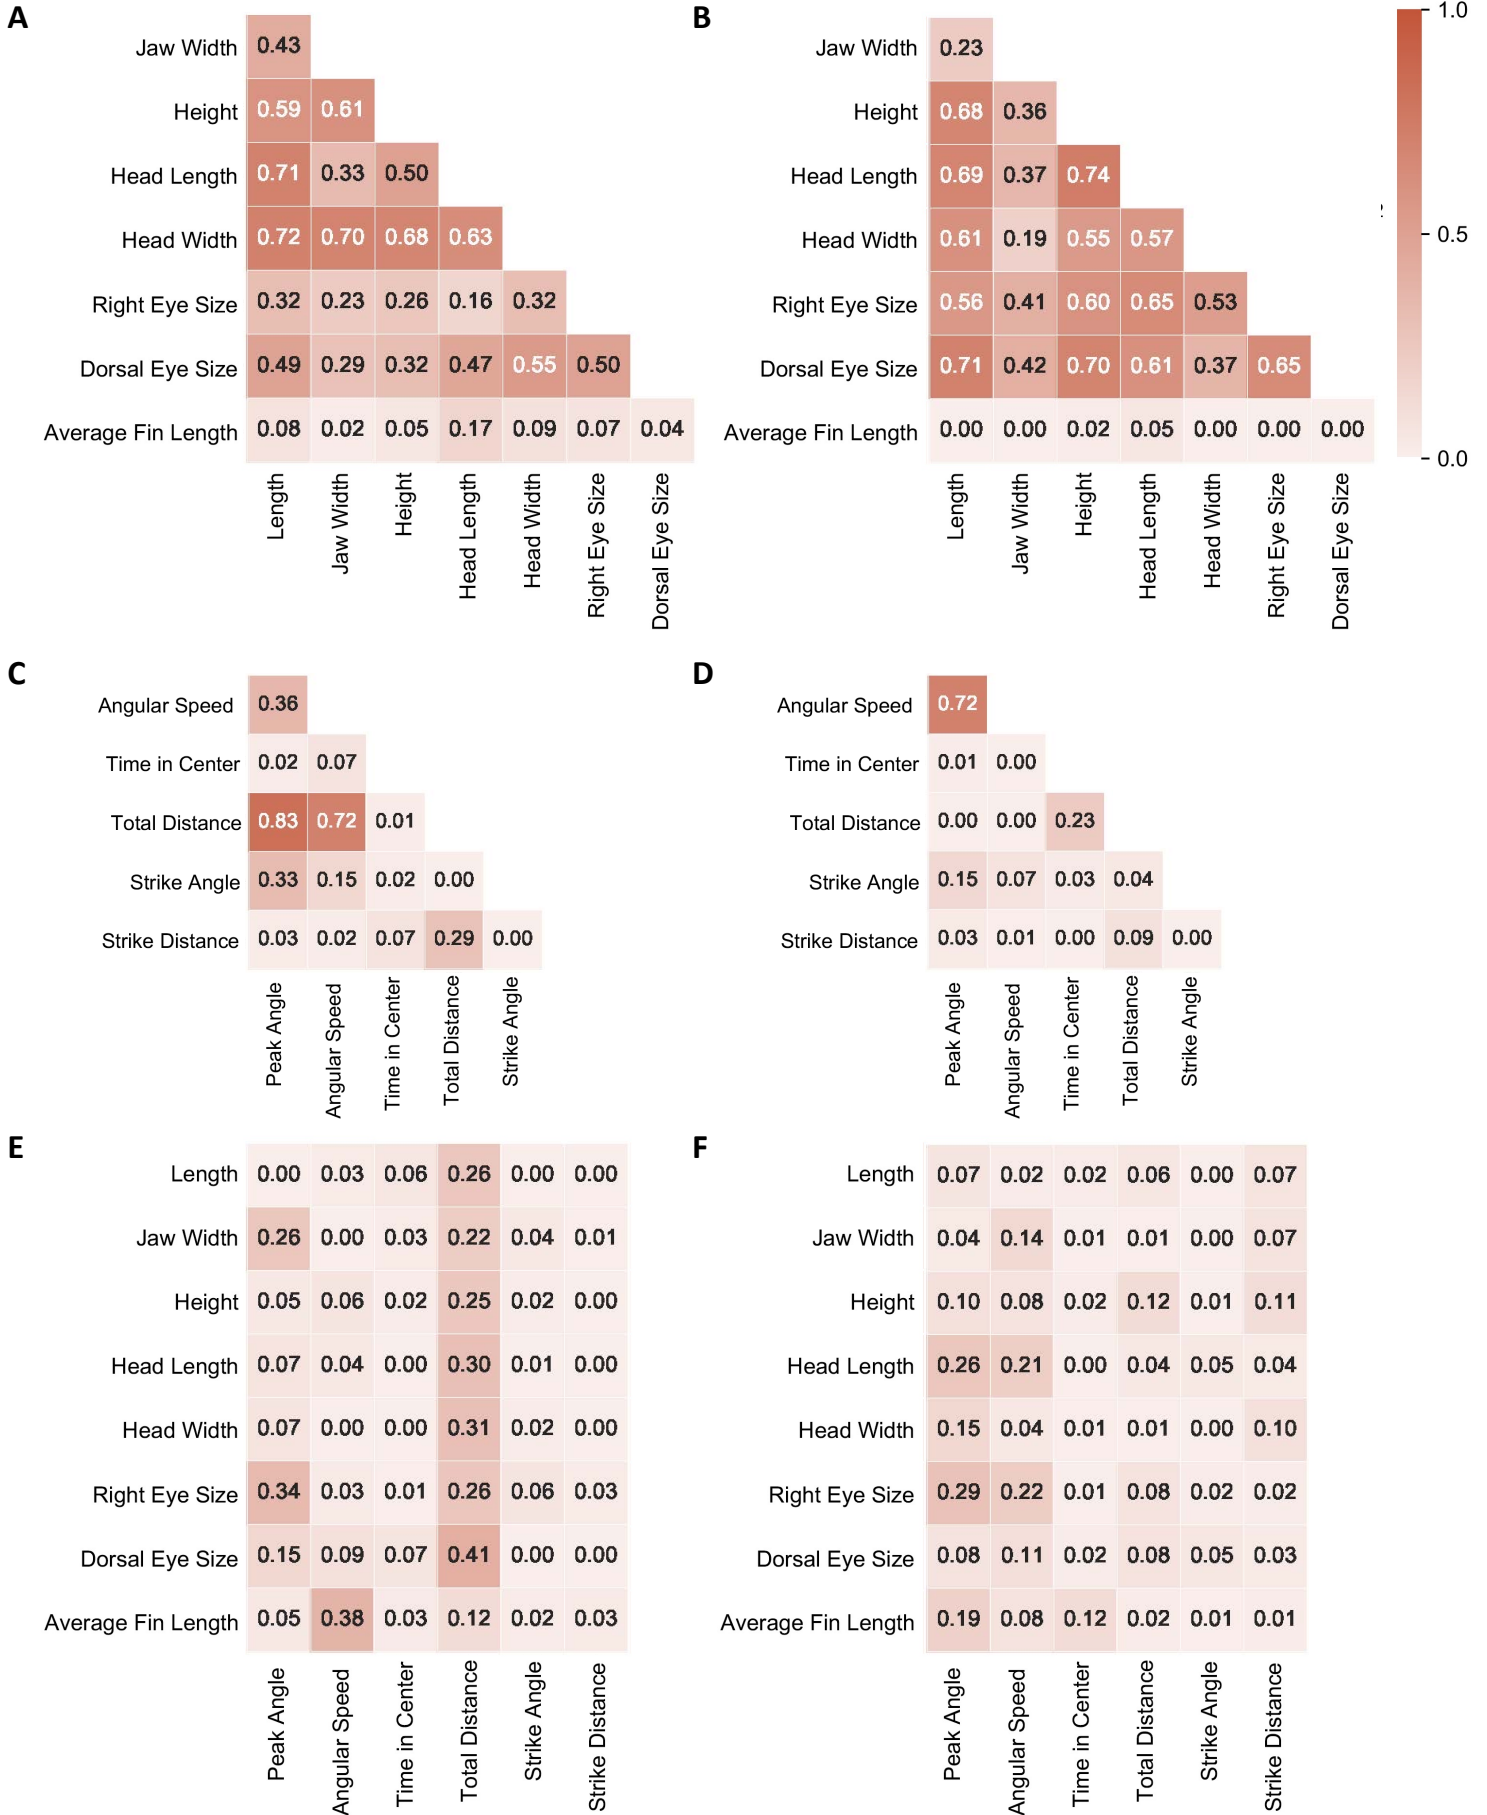

Supplementary Figure 5

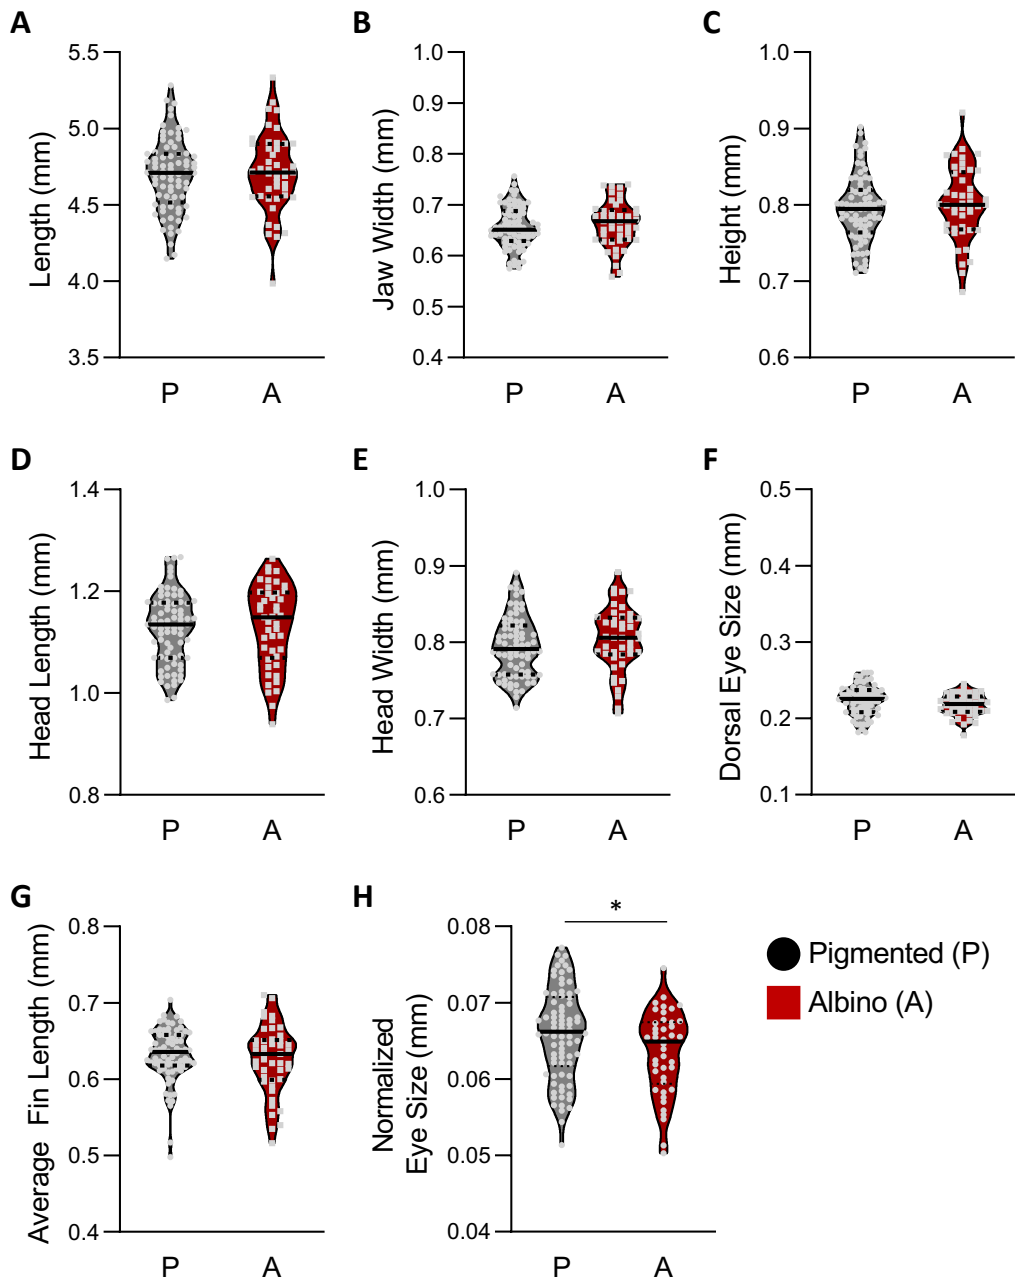

Supplementary Figure 6

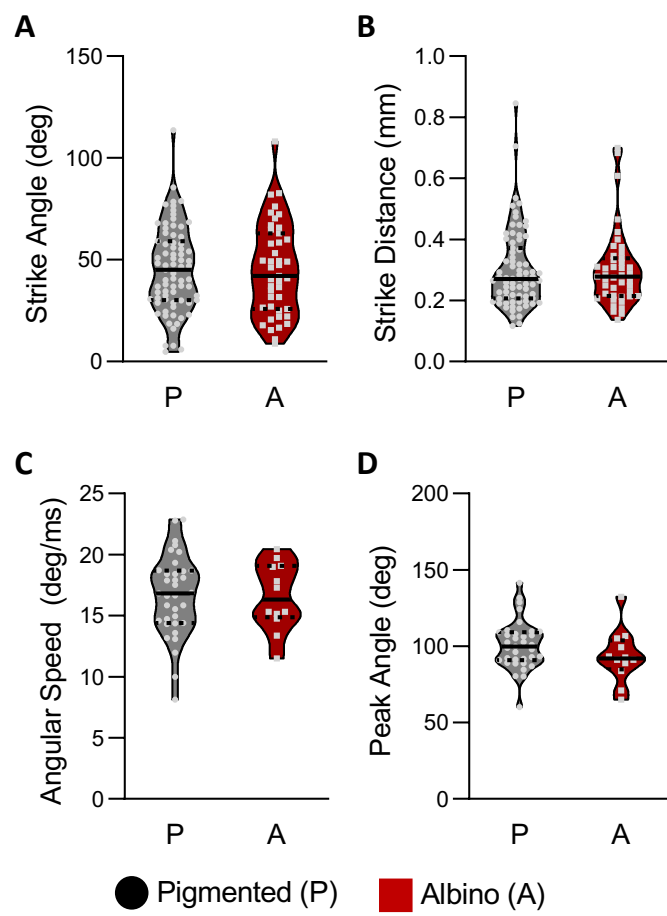

Supplement: EDE-24--s003.pdf [file EDE-24--s003.pdf]
